# Supplementary material for: Different Immune Control of Gram-Positive and Gram-Negative Mammary Infections in Dairy Cows
Source: MDPI journal article supplement (doi:10.3390/vetsci11040166), 2024-04-06
Supplement: s1 [file s1]

## SUPPLEMENTARY MATERIAL

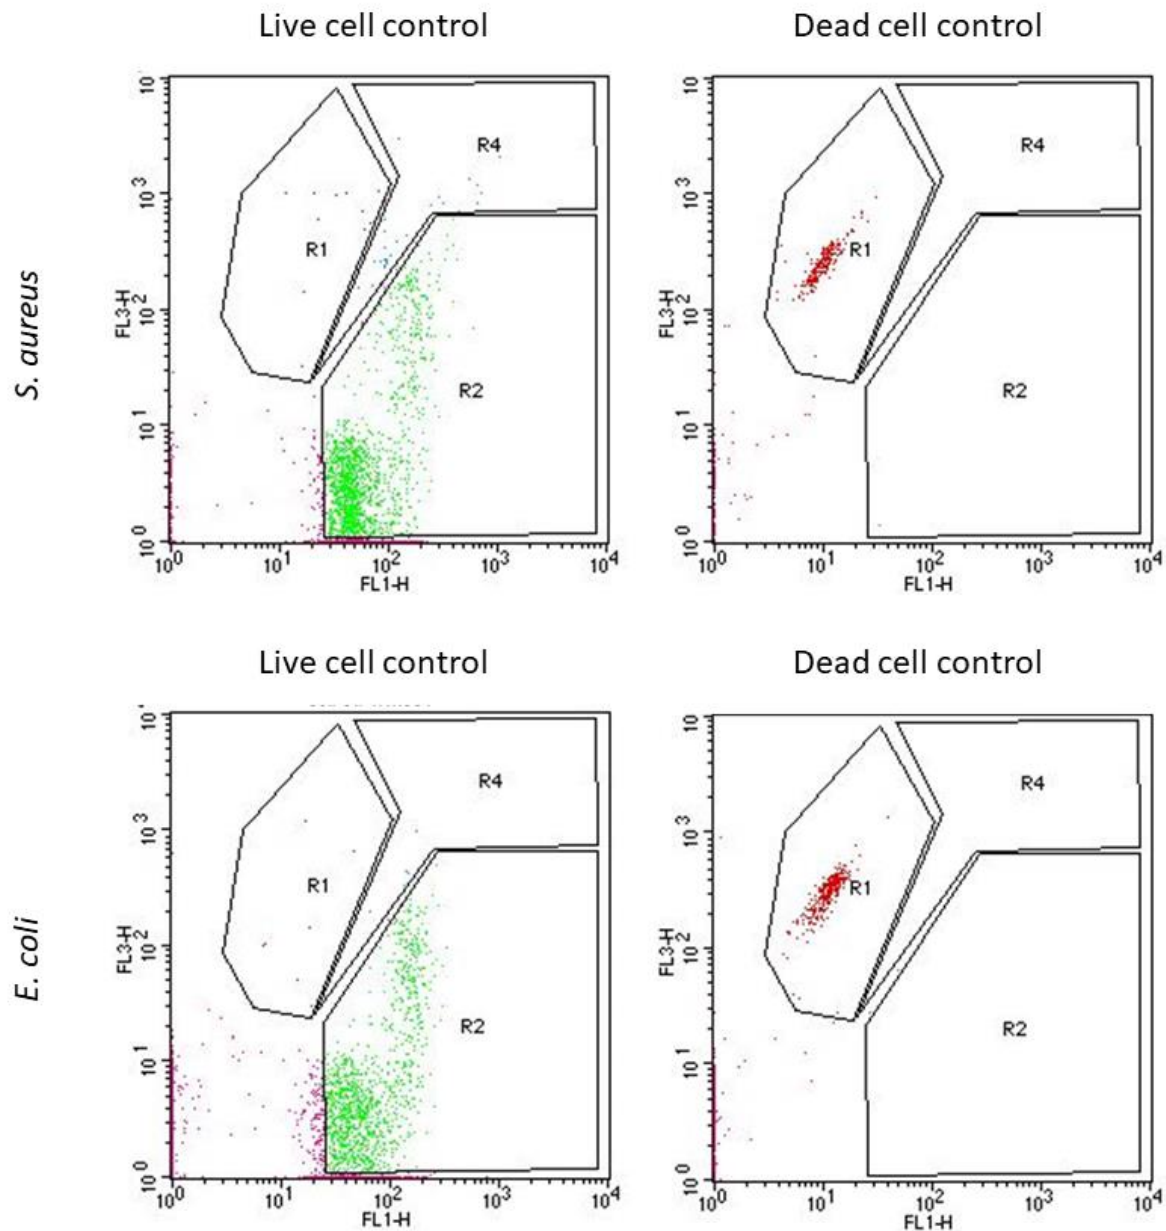

**Supplementary Figure S1.** FACS gating strategy for the analysis of killing activity of milk.

Bacterial cells were stained with both Cyto 9 (x axis, FL1) and Propidium iodide (y axis, FL3) , staining live and dead bacterial cells in the green and red fluorescence channels, respectively, and gated by a combination of forward and side scatter. Bacterial viability was analyzed in a red x green cytogram, which allowed for discrimination between dead/live/subvital cells. In particular, live cells can be seen in Region 2 (R2), dead cells in R1 and the subvital ones in R4. Log phase *E. coli* and *S. aureus* grown in BHI medium for 2 hours (live cell control); Log phase *E. coli* and *S. aureus* in BHI medium for 2 hours, resuspended in 70% isopropyl alcohol, and kept at room temperature for 60 minutes (dead cell control).

**Supplementary Table S1.** Type of IMI

| Type of IMI                                                      | N of quarters MOD | N of quarters HF |
|------------------------------------------------------------------|-------------------|------------------|
| NSR* (not significant result)                                    | 40                | 17               |
| NASM (Non-aureus <i>Staphylococci</i> and <i>Mammaliicocci</i> ) | 12                | 31               |
| <i>S. aureus</i>                                                 | 3                 | 0                |
| <i>S. dysgalactiae</i>                                           | 0                 | 1                |
| <i>A. viridans</i>                                               | 0                 | 2                |
| <i>Proteus spp.</i>                                              | 0                 | 4                |
| <i>E. faecalis</i>                                               | 0                 | 1                |
| <i>S. xylosus</i>                                                | 2                 | 0                |
| <i>Corynebacterium sp.</i>                                       | 0                 | 1                |
| <i>C. bovis</i>                                                  | 2                 | 0                |
| <i>C. stationis</i>                                              | 0                 | 1                |
| <i>Streptococcus sp.</i>                                         | 1                 | 2                |
| <i>S. chromogenes</i>                                            | 7                 | 3                |
| <i>S. haemoliticus</i>                                           | 0                 | 1                |
| <i>S. succinius</i>                                              | 0                 | 1                |
| <i>L. paracasei</i>                                              | 1                 | 0                |
| <i>A. johnsonii</i>                                              | 1                 | 0                |
| <i>A. iwoffii</i>                                                | 0                 | 2                |
| <i>Bacillus sp.</i>                                              | 0                 | 3                |
| <i>B. subtilis</i>                                               | 0                 | 1                |

- NSR means that the isolated bacteria were not relevant for IMI.

killing *S. aureus*

killing *E. coli*

NAGase

all time points

T1

T2

T3

T4

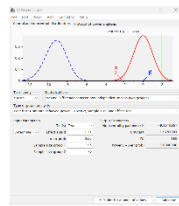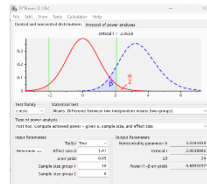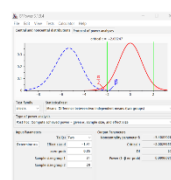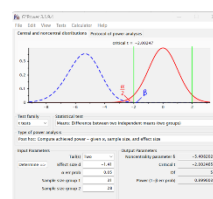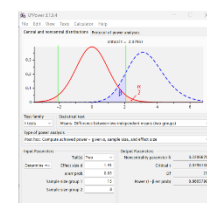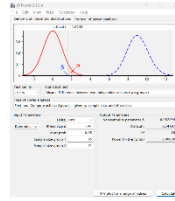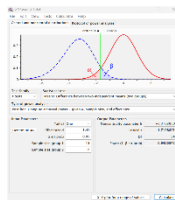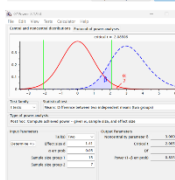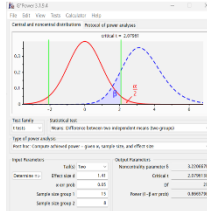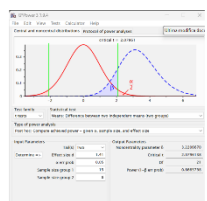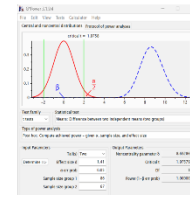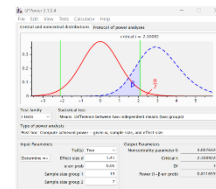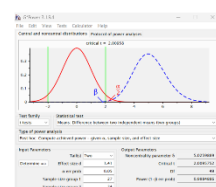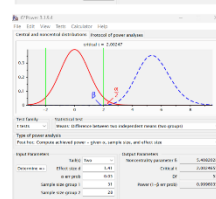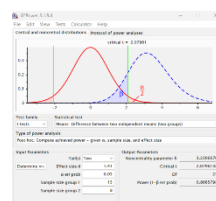

**Supplementary Figure S2. G\*power analysis of sample size and statistical power.**

The figure shows the screen shots of the G\*power software analysis (G\*power software version 3.1.9.4 (Franz Faul, Universitat Kiel, Germany) used to evaluate the statistical power of our analysis based on the sample size used.

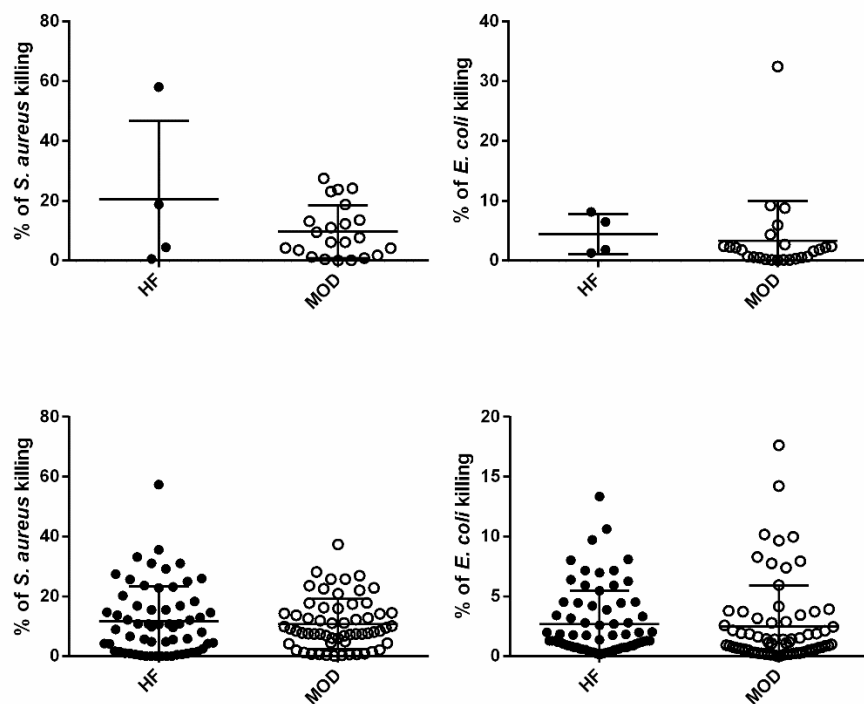

**Supplementary Figure S3.** Bacterial killing activity in culture negative and positive quarters of MOD and HF.

The figure shows the comparison of the *S. aureus* and *E. coli* killing activity of culture negative and positive quarters in the two cattle breeds under study.
